# Supplementary material
Source: PubMed Central journal article supplement (PMC7134334)
Supplement: NIHMS1570601-supplement-Supporting.pdf [file NIHMS1570601-supplement-Supporting.pdf]

## Supplementary Material

### Figure S1

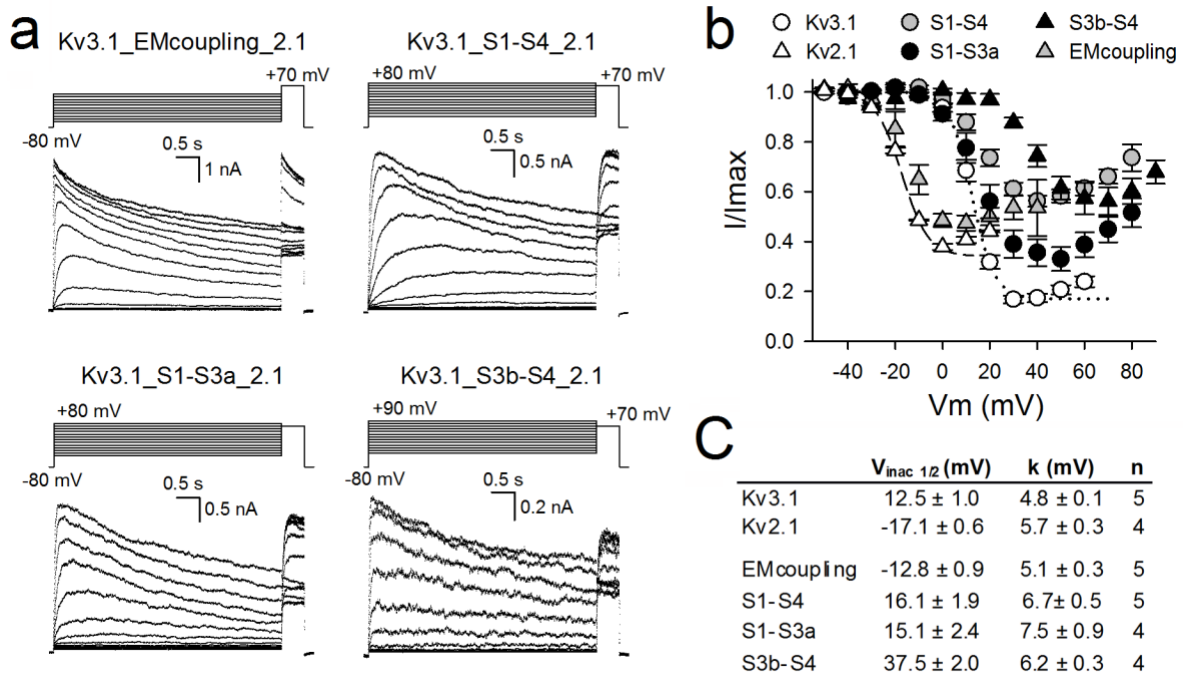

**Figure S1.** Voltage dependence of inactivation for the chimeric channels.

Panel **a** shows representative ionic current recordings to determine the inactivation process in the chimeras Kv3.1\_EMcoupling\_2.1, Kv3.1\_S1-S4\_2.1, Kv3.1\_S1-S3a\_2.1, and Kv3.1\_S3b-S4\_2.1 elicited by applying depolarization steps from a -80 mV holding potential (pulse protocols are shown on top and inter-pulse time was 20 s). Note the gradual decrease in current amplitude during the 5 s depolarization step. To estimate the degree of channel inactivation, a +70 mV test pulse was applied after the 5 s depolarization step. Panel **b** displays the voltage dependence of channel inactivation for WT Kv3.1 (white circles and with the dotted line representing the average Boltzmann fit), WT Kv2.1 (white triangles and dashed line), Kv3.1\_EMcoupling\_2.1 (gray triangles), Kv3.1\_S1-S4\_2.1 (gray circles), Kv3.1\_S1-S3a\_2.1 (black circles), and Kv3.1\_S3b-S4\_2.1 (black triangles). Data were obtained by plotting the normalized current during the +70 mV test pulse as a function of the pre-pulse depolarization potential. Note that all channels displayed a U-type inactivation profile and the amount of channel inactivation is less at stronger depolarizations. Panel **c** lists for the different channels the mean  $V_{inac\ 1/2}$  and slope factor  $k$  value  $\pm$  S.E.M. with  $n$  the number of cells analyzed. Parameters were obtained by approximating the voltage dependence of channel inactivation (plots in panel **b**) with a Boltzmann equation (see material and methods section).

## Figure S2

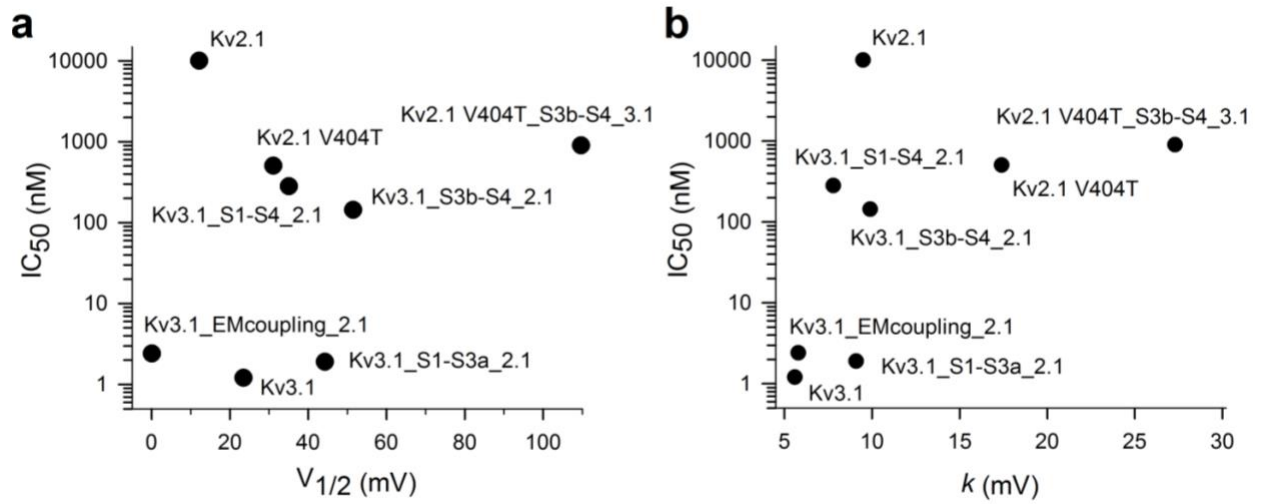

**Figure S2.** Mapping of the affinity versus biophysical properties.

Graphs display the  $IC_{50}$  values of gambierol sensitivity for WT and chimeric channels against either the voltage dependence of channel activation in panel **a** or the slope factor in panel **b**. Both analysis clearly indicated that there is no correlation between both parameters, which suggests that the affinity of the chimeres is not determined by their biophysical properties.

## Figure S3

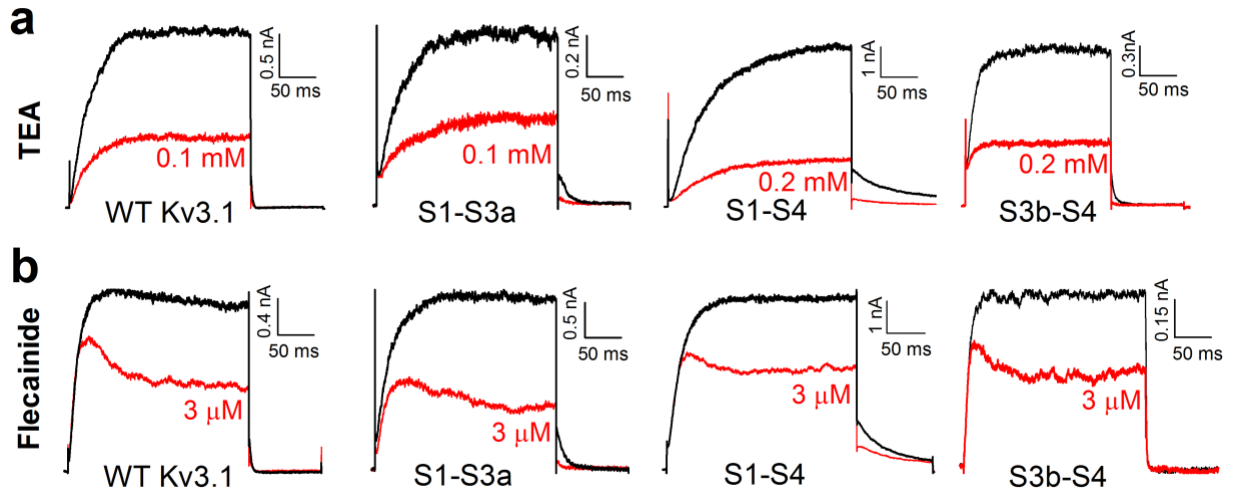

**Figure S3.** Sensitivity of the different chimeric channels to inhibitors interacting with the pore domain.

**a)** Current tracings showing the ionic current during a depolarization pulse (WT Kv3.1: +30 mV, S1-S3a: +60 mV, S1-S4: +70 mV, S3b-S4 paddle: +70 mV) in control (black) and after steady-state inhibition by the external pore blocker TEA (red). **b)** The internal cavity blocker flecainide was tested at depolarization pulses ( $V_{1/2} + 30$  mV) where most of the channels are open. No changes in affinity were observed compared to WT Kv3.1.

## Figure S4

|        | <u>S3a</u>                                                      | <u>S3b-S4 paddle</u>          |     |
|--------|-----------------------------------------------------------------|-------------------------------|-----|
| Kv3.1  | NSLNIIDFVAILPFYLEVGLSG-----                                     | LSSKAAKDVLGFLRVVRFVRIILRIFKL  | 324 |
| Kv3.2b | NLLNIIDFVAILPFYLEVGLSG-----                                     | LSSKAAKDVLGFLRVVRFVRIILRIFKL  | 361 |
| Kv3.3  | SSLNIIDCVAILPFYLEVGLSG-----                                     | LSSKAAKDVLGFLRVVRFVRIILRIFKL  | 427 |
| Kv3.4b | NLLNIIDFVAILPFYLEVGLSG-----                                     | LSSKAARDVLGFLRVVRIIVRIILRIFKL | 360 |
| Kv1.1  | NIMNFIDIVAIIPYFITLGTETIAEQ-----                                 | EGNQKGEQATSLAILRVIRLVRVFRIFKL | 305 |
| Kv1.2  | NIMNIIDIVAIIPYFITLGTETLAKEP-----                                | EDAQQGQQAMSLAILRVIRLVRVFRIFKL | 307 |
| Kv1.3  | NIMNLIIDIVAIIPYFITLGTETLAERQ-----                               | GNGQQAMSLAILRVIRLVRVFRIFKL    | 325 |
| Kv1.4  | NIMNIIDIVSILPYFITLGTDLAQQQ-----                                 | GGGNGQQQAMSFALRIIRLVRVFRIFKL  | 457 |
| Kv1.6  | NIMNIIDLVAIFPYFITLGTETLVQQQEQQPASGGGGQNGQQAMSLAILRVIRLVRVFRIFKL |                               | 355 |
| Kv1.5  | NIMNIIDVVAIFPYFITLGTETLAEQQPGG---                               | GGGQNGQQAMSLAILRVIRLVRVFRIFKL | 413 |
| Kv1.7  | NVMNLIIDFVAILPYFVALGTETLARQR-----                               | GVGQQAMSLAILRVIRLVRVFRIFKL    | 291 |
| Kv1.8  | NIMNIIDIISIIIPYFATLITELVQETEP-----                              | SAQQNMSLAILRIIRLVRVFRIFKL     | 354 |

**Figure S4.** Primary sequence alignment of the S3b-S4 paddle region within Kv3 and Kv1 subfamilies. Whereas the sequence is conserved between Kv3 family members, it is highly variable both in sequence and length between within the Kv1 family.
